# Supplementary material
Source: publisher figshare collection journal article supplement (https://gsapubs.figshare.com/ndownloader/files/34172139)
Supplement: Supplementary file 1 [file 34172139]

## Sheet: Table S3
TABLE S3: Sm AND Nd ISOTOPIC COMPOSITION AND ELEMENTAL ABUNDANCE DATA FOR THE Andraum-3 CORE
Sample Height (m)	Formation	Age (Ma)	143Nd/144Nd	2s (e)	eNd(0)	eNd(T)	Nd (ppm)	Sm (ppm)	TDM	147Sm/144Nd
7.02	Alum Shale	495	0.512038	3.10917e-06	-11.6995	-6.54359	59.6431	11.3655	1.73651	0.115223
7.98	Alum Shale	495	0.511993	2.79623e-06	-12.5725	-7.28043	51.3559	9.60257	1.76662	0.113059
8.39	Alum Shale	495	0.512019	2.57515e-06	-12.0731	-6.99553	55.7286	10.7326	1.78805	0.116449
8.98	Alum Shale	495	0.511983	3.48045e-06	-12.7698	-6.6903	39.2643	6.53573	1.5872	0.100648
9.96	Alum Shale	495	0.512011	3.10233e-06	-12.2212	-7.37354	52.8708	10.4987	1.86901	0.120069
10.01	Alum Shale	495	0.511994	3.97197e-06	-12.5627	-7.49954	53.228	10.2703	1.83114	0.116668
10.33	Alum Shale	495	0.511975	2.01205e-05	-12.9301	-8.15142	43.5668	8.72852	1.94983	0.121142
10.36	Alum Shale	495	0.511931	2.31036e-05	-13.7827	-8.28304	41.7736	7.58328	1.80116	0.109765
10.39	Alum Shale	495	0.511955	2.15997e-05	-13.3322	-8.18467	47.8574	9.12754	1.86683	0.115323
10.5	Alum Shale	495	0.511934	2.44133e-05	-13.728	-8.3996	44.4408	8.26584	1.84471	0.112464
10.54	Alum Shale	495	0.511968	2.30178e-05	-13.0703	-7.66486	49.086	9.03237	1.77348	0.111264
11	Alum Shale	495	0.512037	3.46788e-06	-11.7243	-7.06118	50.9185	10.3568	1.88636	0.122987
11.3	Alum Shale	495	0.512006	3.56167e-06	-12.3296	-7.60973	52.825	10.6654	1.91895	0.12208
11.6	Alum Shale	495	0.511968	3.63361e-06	-13.0696	-7.52807	39.9927	7.21719	1.73726	0.109118
12	Alum Shale	495	0.511993	3.11615e-06	-12.5767	-6.92577	45.5653	8.09367	1.67345	0.107404
12.4	Alum Shale	495	0.512001	2.50975e-06	-12.4284	-7.18406	56.944	10.7186	1.76872	0.113815
12.79	Alum Shale	495	0.511974	3.29269e-06	-12.951	-7.68245	42.1421	7.90505	1.80222	0.113422
13.09	Alum Shale	495	0.512012	4.07884e-06	-12.2162	-7.1019	42.9417	8.22874	1.78882	0.115868
13.4	Alum Shale	495	0.511995	3.58651e-06	-12.5412	-7.12826	34.3468	6.31403	1.73163	0.111155
13.8	Alum Shale	495	0.51196	3.3096e-06	-13.234	-7.59576	40.4072	7.19001	1.72441	0.107592
14	Alum Shale	495	0.511953	3.84206e-06	-13.3528	-7.3404	37.8104	6.35908	1.64231	0.101693
14	Alum Shale	495	0.512004	3.76736e-06	-12.3768	-6.39548	38.386	6.48816	1.58187	0.102201
14.98	Alum Shale	495	0.512014	3.02873e-06	-12.1636	-7.288	54.9277	10.8673	1.8556	0.11963
16.03	Alum Shale	495	0.512068	3.32347e-06	-11.1132	-6.51286	55.4808	11.3767	1.85454	0.123989
17.46	Alum Shale	495	0.511979	3.09574e-06	-12.8457	-7.22042	41.5696	7.41133	1.69941	0.107803
19.24	Alum Shale	495	0.512005	3.65389e-06	-12.3553	-6.9524	46.8539	8.62579	1.72029	0.111317

## Sheet: G49833
Rooney, A.D., Milikin, A.E.G., and Ahlberg, P., 2022, Re-Os geochronology for the Cambrian SPICE event: Insights into euxinia and enhanced continental weathering from radiogenic isotopes: Geology, v. 50, https://doi.org/10.1130/G49833.1
